# Supplementary material for: Synthesis of Co3O4/Fe2O3 double-shelled nanocages with enhanced pseudocapacitance
Source: Royal Society of Chemistry journal article supplement (doi:10.1039/d4ce01169d), 2025-01-01
Supplement: d4ce01169d1.pdf [file d4ce01169d1.pdf]

## Supporting Information

### Designed Formation of $\text{Co}_3\text{O}_4/\text{Fe}_2\text{O}_3$ Double-Shelled Nanocages with Enhanced Pseudocapacitance

Hui Ju<sup>a</sup>, Chenjin Pu<sup>a</sup>, Jixiang Yang<sup>a</sup>, Xinyi Deng<sup>a</sup>, Sheng Wang<sup>a</sup>, Xiaohong Xie<sup>a</sup>, Weiyi Yi<sup>a</sup>, Shuxin Liu<sup>a,\*</sup>, Quanlong Li<sup>b</sup>

<sup>a</sup>College of Chemistry and Chemical Engineering, Mianyang Teachers' College, Mianyang, 621900, China.

<sup>b</sup>Dalian Rongke Power Co., Ltd, Dalian, 116000, China.

\*Corresponding author: E-mail address: liushuxin88@126.com (S. Liu), quanlong.li@rongkepower.com (Q. Li)

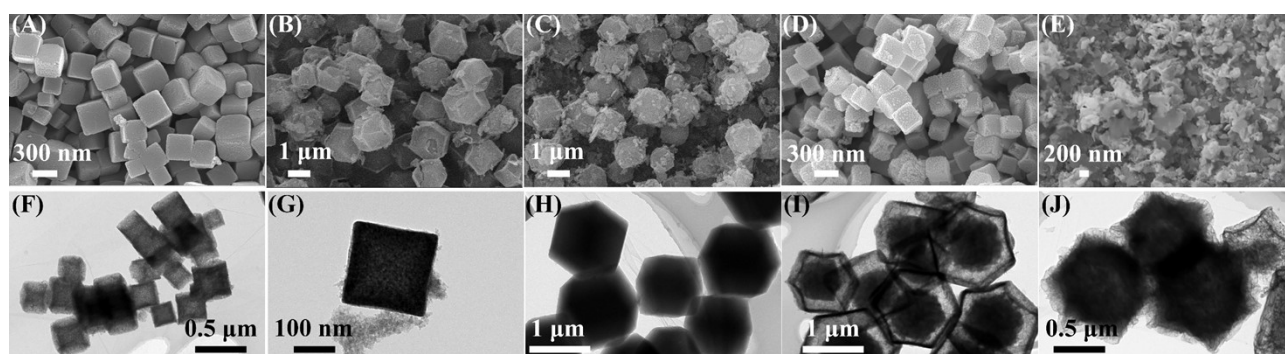

Fig.S1 SEM images: (A) Co-Fe PBA, (B) ZIF-67/Co-Fe PBA-E, (C) ZIF-67/Co-Fe PBA-F, (D)  $\text{Co}_3\text{O}_4/\text{Fe}_2\text{O}_3$  NCs, (E) increasing heating rate during calcination process. TEM images: (F)  $\text{Co}_3\text{O}_4/\text{Fe}_2\text{O}_3$  NCs for low magnification, (G)  $\text{Co}_3\text{O}_4/\text{Fe}_2\text{O}_3$  NCs for high magnification, (H) ZIF-67, (I) ZIF-67/Co-Fe PBA, (J)  $\text{Co}_3\text{O}_4$  Ps.

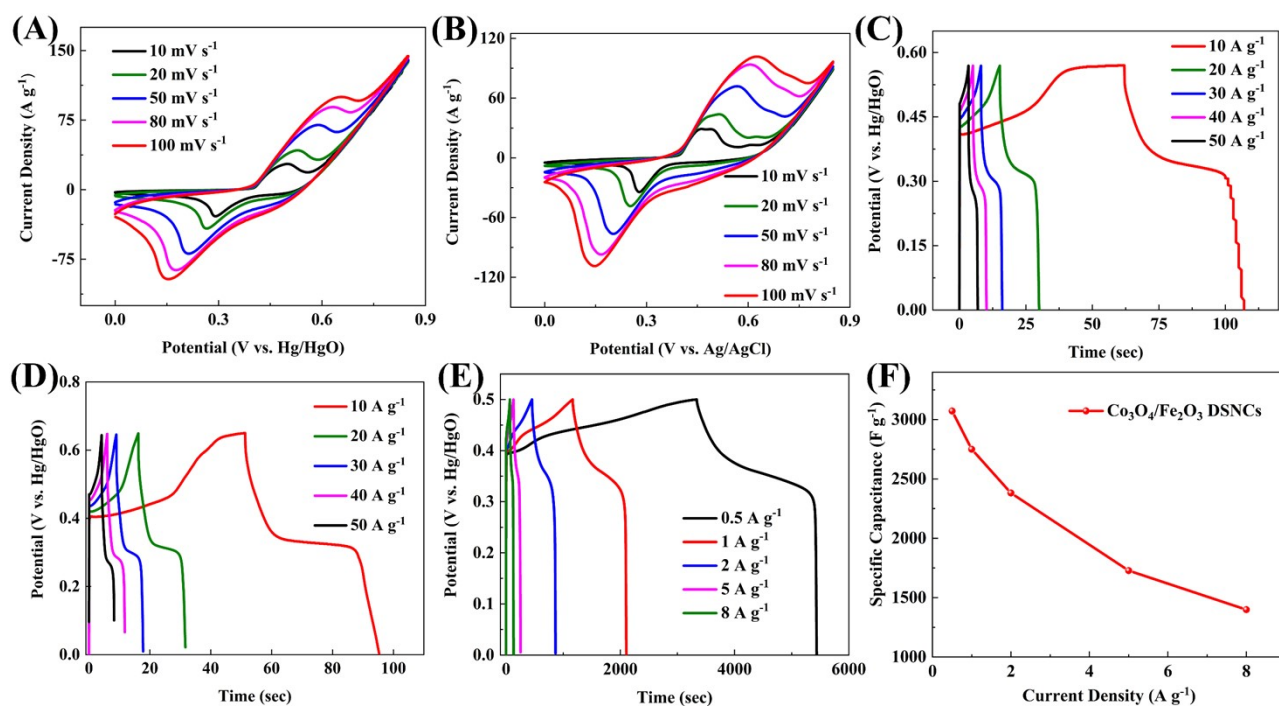

Fig.S2 CV curve: (A)  $\text{Co}_3\text{O}_4/\text{Fe}_2\text{O}_3$  NCs, (B)  $\text{Co}_3\text{O}_4$  Ps. GCD curve: (C)  $\text{Co}_3\text{O}_4/\text{Fe}_2\text{O}_3$  NCs, (D)  $\text{Co}_3\text{O}_4$  Ps, (E)  $\text{Co}_3\text{O}_4/\text{Fe}_2\text{O}_3$  DSNCs at low current densities. (F) The specific capacitance diagram of  $\text{Co}_3\text{O}_4/\text{Fe}_2\text{O}_3$  DSNCs at low current densities.

The specific capacitance ( $C$ ) is obtained from CV curves at different scan rates<sup>1</sup>:

$$C = \frac{\int IdV}{2v \cdot m \cdot \Delta V}$$

where  $\int IdV$  is the integral area of CV curve,  $v$  is the scan rate (V/s),  $m$  is the mass of the electrode active material (g), and  $\Delta V$  is the potential window (V).

According to the above formula and CV curves of the cycling performance, Fig.S3 is calculated.

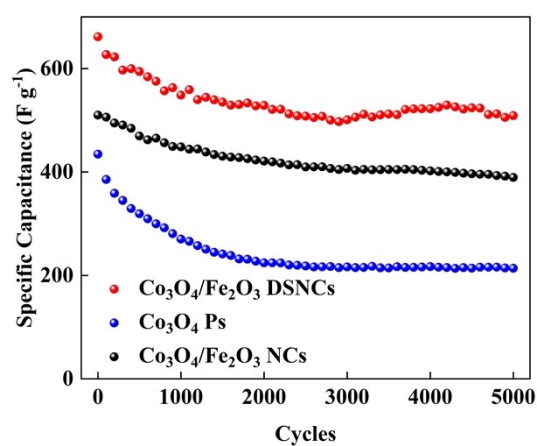

Fig.S3 The relationship between specific capacitance and cycles

## References

1. G. Harichandran, S. Radha, P. Divya and J. Yesuraj, *J. Mater. Sci.-Mater. El.*, 2019, **31**, 1646-1653.
